# Supplementary material
Source: PubMed Central journal article supplement (PMC3138529)
Supplement: NIHMS308415-supplement.pdf [file NIHMS308415-supplement.pdf]

**Supplemental Table 1.** Percentage change (95% interval) in risk of hospital admissions or emergency visits per 10 ppb 24-hour mean ozone, meta-analysis results using different metric conversion ratios

| Disease Categories<br>(age group)             | Metric Conversion Ratio       |                                          |                              | Number of Estimates |              |             |               | Studies Included          |
|-----------------------------------------------|-------------------------------|------------------------------------------|------------------------------|---------------------|--------------|-------------|---------------|---------------------------|
|                                               | EPA<br>(2:1.5:1) <sup>a</sup> | U.S. Study<br>(1.76:1.53:1) <sup>a</sup> | Community-<br>specific Ratio | 8-hr<br>max         | 8-hr<br>mean | 1-hr<br>max | 24-hr<br>mean |                           |
| <b>General Hospital Admissions</b>            |                               |                                          |                              |                     |              |             |               |                           |
| Total RD <sup>b</sup> (All ages) <sup>c</sup> | 2.01 (-0.20, 4.28)            | 2.03 (-0.21, 4.31)                       | 2.05 (-0.20, 4.35)           | 1                   | 3            | 1           | 1             | 1-6                       |
| Total RD (Elderly)                            | <b>2.50 (0.91, 4.12)</b>      | <b>2.47 (0.89, 4.07)</b>                 | <b>2.38 (0.84, 3.94)</b>     | 0                   | 1            | 2           | 5             | 3, 6-11                   |
| Total RD (Children) <sup>d</sup>              | 0.71 (-2.00, 3.49)            | 0.69 (-2.03, 3.48)                       | 0.67 (-2.10, 3.51)           | 1                   | 1            | 1           | 1             | 2, 3, 5, 12               |
| Pneumonia (Elderly) <sup>d</sup>              | <b>4.23 (2.85, 5.63)</b>      | <b>4.24 (2.85, 5.63)</b>                 | <b>4.25 (2.87, 5.64)</b>     | 0                   | 0            | 1           | 4             | 8, 10, 13-15              |
| COPD (All ages)                               | <b>5.78 (0.69, 11.18)</b>     | <b>5.74 (0.71, 10.96)</b>                | <b>3.73 (-1.26, 8.97)</b>    | 2                   | 0            | 1           | 1             | 2, 6, 16-18               |
| COPD (Elderly) <sup>c</sup>                   | <b>2.53 (1.83, 3.25)</b>      | <b>2.54 (1.29, 3.80)</b>                 | <b>2.54 (1.30, 3.80)</b>     | 0                   | 1            | 2           | 5             | 6, 8, 10, 13, 15, 19, 20  |
| Asthma (All ages)                             | 4.38 (-0.17, 9.13)            | 4.35 (-0.18, 9.10)                       | 4.37 (-0.30, 9.28)           | 0                   | 2            | 1           | 3             | 2, 16, 21-24              |
| Asthma (Children)                             | 0.75 (-7.05, 6.00)            | -0.68 (-6.56, 5.57)                      | -0.69 (-6.59, 5.59)          | 0                   | 2            | 4           | 0             | 2, 19, 25-28              |
| <b>Emergency Hospital Admissions</b>          |                               |                                          |                              |                     |              |             |               |                           |
| Total RD (All ages)                           | <b>1.87 (0.73, 3.02)</b>      | <b>1.90 (0.74, 3.07)</b>                 | <b>1.97 (0.76, 3.19)</b>     | 2                   | 5            | 0           | 3             | 29-37                     |
| Total RD (Elderly)                            | <b>4.39 (2.42, 6.40)</b>      | <b>4.47 (2.48, 6.50)</b>                 | <b>4.59 (2.52, 6.69)</b>     | 4                   | 5            | 0           | 2             | 29-31, 35, 36, 38-41      |
| Total RD (15-64 years)                        | 1.04 (-1.38, 3.41)            | 1.06 (-1.31, 3.47)                       | 0.86 (-1.34, 3.10)           | 4                   | 2            | 0           | 0             | 29, 31, 35, 38, 40        |
| COPD (All Ages)                               | <b>4.98 (1.24, 8.86)</b>      | <b>5.06 (1.24, 9.05)</b>                 | <b>5.13 (1.31, 9.09)</b>     | 3                   | 2            | 0           | 1             | 30, 38, 42-44             |
| Asthma (All Ages)                             | <b>6.51 (2.56, 10.63)</b>     | <b>6.64 (2.60, 10.85)</b>                | <b>6.73 (2.68, 10.96)</b>    | 3                   | 5            | 0           | 0             | 30, 31, 35, 38, 42, 45-47 |
| Asthma (Children)                             | 2.78 (-3.38, 9.33)            | 2.83 (-3.45, 9.52)                       | 2.87 (-3.52, 9.67)           | 3                   | 3            | 0           | 0             | 31, 35, 40, 45, 47, 48    |
| Asthma (15-64 years)                          | 3.59 (-2.00, 9.50)            | 3.63 (-2.02, 9.60)                       | 3.78 (-2.21, 10.14)          | 2                   | 4            | 0           | 0             | 31, 35, 36, 40, 47        |
| <b>Emergency Visits</b>                       |                               |                                          |                              |                     |              |             |               |                           |
| Total RD (All ages)                           | <b>1.21 (0.28, 2.14)</b>      | <b>1.23 (0.29, 2.17)</b>                 | <b>1.29 (0.25, 2.35)</b>     | 4                   | 0            | 0           | 1             | 49-52                     |
| Total RD (Children)                           | 2.78 (-1.85, 7.63)            | 2.55 (-1.71, 6.98)                       | 2.56 (-1.72, 7.03)           | 3                   | 0            | 1           | 0             | 51, 53, 54                |
| Asthma (All ages)                             | <b>4.75 (2.14, 7.42)</b>      | <b>4.50 (2.05, 6.99)</b>                 | <b>4.61 (2.14, 7.14)</b>     | 6                   | 0            | 2           | 0             | 50, 51, 55-59             |
| Asthma (Children)                             | <b>3.76 (1.59, 5.97)</b>      | <b>3.67 (1.55, 5.81)</b>                 | <b>3.81 (1.61, 6.05)</b>     | 8                   | 1            | 2           | 2             | 48, 51, 59-68             |

<sup>a</sup>The ratio of the 1-hr max: 8-hr max: 24-hr mean is provided in parentheses.

<sup>b</sup>RD = Respiratory Diseases

<sup>c</sup>The combined estimates excluded one outlying study.<sup>69</sup>

<sup>d</sup>Fixed-effect model used. Random-effect model used elsewhere.

<sup>d</sup>Estimates converted with the U.S. study ratio and specific ratios were combined in random-effect models; estimates converted using the EPA ratio were combined in a fixed-effect model.

**Supplemental Table 2.** Multi city studies on ozone and risk of hospital admissions or emergency visits

| Hospitalization Type          | Disease Category      | Location                      | Lag Selection      | Age Group | Pollutants Model  | Season of Analysis | Estimates (95% Confidence Interval) | Original Ozone Metric  | Reference                               |                    |                   |
|-------------------------------|-----------------------|-------------------------------|--------------------|-----------|-------------------|--------------------|-------------------------------------|------------------------|-----------------------------------------|--------------------|-------------------|
| General Hospital Admission    | Total RD <sup>a</sup> | 16 Cities (Canada)            | Lag1               | All       | Single            | Warm               | 2.50 (1.56, 3.45)                   | 1-hr max               | Burnett et al., 1997 <sup>70</sup>      |                    |                   |
|                               |                       |                               |                    | 65+       |                   |                    | 2.33 (0.55, 4.13)                   |                        |                                         |                    |                   |
|                               |                       |                               |                    | 0-64      |                   |                    | 2.62 (1.27, 3.98)                   |                        |                                         |                    |                   |
|                               |                       |                               |                    | All       | 2.50 (1.27, 3.75) |                    |                                     |                        |                                         |                    |                   |
| Emergency Hospital Admission  | Asthma                | 4 Cities (Europe)             | Lag0 or lag1       | 15-64     | Single            | All                | 2.45 (-4.49, 9.89)                  | 8-hr max <sup>b</sup>  | Sunyer et al., 1997 <sup>71</sup>       |                    |                   |
|                               |                       |                               | Lag1 or lag2       | 0-14      | Single            | All                | -0.77 (-4.14, 2.71)                 |                        |                                         |                    |                   |
| Emergency Hospital Admission  | COPD                  | 5 Cities (Europe)             | One Day            | All       | Single            | All                | 2.60 (1.32, 3.90)                   | 8-hr mean <sup>b</sup> | Anderson et al., 1997 <sup>72</sup>     |                    |                   |
|                               |                       |                               |                    |           |                   | Cold               | 1.82 (-0.26, 3.95)                  |                        |                                         |                    |                   |
|                               |                       |                               |                    |           |                   | Warm               | 2.42 (0.94, 3.93)                   |                        |                                         |                    |                   |
|                               |                       |                               |                    |           |                   | All                | 3.38 (1.64, 5.16)                   |                        |                                         |                    |                   |
| Emergency Hospital Admission  | Total RD              | 4 Cities (Europe)             | Lag0 or lag1       | 15-64     | Single            | All                | 1.88 (0.80, 2.97)                   | 8-hr max <sup>b</sup>  | Spix et al., 1998 <sup>73</sup>         |                    |                   |
|                               |                       |                               |                    |           |                   | Warm               | 1.22 (-2.30, 4.86)                  |                        |                                         |                    |                   |
|                               |                       |                               |                    |           |                   | Cold               | 0.92 (-2.03, 3.96)                  |                        |                                         |                    |                   |
|                               |                       |                               |                    |           |                   | 65+                | Single                              |                        |                                         | All                | 2.30 (1.11, 3.52) |
|                               |                       |                               |                    |           |                   | Warm               | 2.42 (0.94, 3.93)                   |                        |                                         |                    |                   |
| Emergency Visit               | Asthma                | 3 Cities (U.S.)               | Best available lag | 5-34      | Single            | All                | 4.63 (0.06, 9.40)                   | 8-hr max               | Jaffe et al., 2003 <sup>74</sup>        |                    |                   |
|                               |                       |                               |                    |           |                   |                    | Cold                                |                        |                                         | 1.22 (-0.59, 3.05) |                   |
| Emergency Hospital Admissions | COPD+Asthma           | 4 Cities (Australia)          | Lag3               | 65+       | Single            | All                | 1.21 (0.15, 2.27)                   | 1-hr max <sup>c</sup>  | Simpson et al., 2005 <sup>75</sup>      |                    |                   |
|                               | Total RD              | 4 Cities (Australia)          | Lag0-1             | 65+       | Single            | All                | 0.40 (-0.55, 1.36)                  | 1-hr max <sup>c</sup>  |                                         |                    |                   |
| General Hospital Admission    | Total RD              | 10 Cities (Canada)            | Not Specified      | All       | Single            | All                | 2.17 (1.12, 3.22)                   | 24-hr mean             | Cakmak et al., 2006 <sup>76</sup>       |                    |                   |
| Emergency Hospital Admission  | Respiratory Disorder  | 11 Cities (Canada)            | Lag2               | 0-28 days | Single            | All                | 2.67 (1.44, 3.91)                   | 24-hr mean             | Dales et al., 2006 <sup>74, 77</sup>    |                    |                   |
| Emergency Hospital Admissions | COPD                  | 36 Cities <sup>d</sup> (U.S.) | Lag0               | 65+       | Single            | All                | -0.98 (-1.34, -0.61)                | 8-hr mean              | Medina-Ramon et al., 2006 <sup>78</sup> |                    |                   |
|                               |                       |                               |                    |           |                   | Warm               | -0.76 (-1.40, -0.12)                |                        |                                         |                    |                   |
|                               |                       |                               |                    |           |                   | Cold               | -1.46 (-2.28, -0.64)                |                        |                                         |                    |                   |
|                               |                       |                               |                    |           |                   | All                | 1.01 (0.58, 1.45)                   |                        |                                         |                    |                   |
|                               |                       |                               |                    |           |                   | Warm               | 1.48 (0.92, 2.03)                   |                        |                                         |                    |                   |
|                               |                       |                               |                    |           |                   | Cold               | 0.43 (-0.41, 1.28)                  |                        |                                         |                    |                   |
|                               |                       |                               |                    |           |                   | All                | 0.12 (-0.38, 0.63)                  |                        |                                         |                    |                   |
| Emergency Hospital Admissions | COPD                  | 36 Cities <sup>d</sup> (U.S.) | Lag0-1             | 65+       | Single            | Warm               | 0.83 (0.23, 1.43)                   |                        |                                         |                    |                   |
|                               |                       |                               |                    |           |                   | Cold               | -0.95 (-1.85, -0.03)                |                        |                                         |                    |                   |

| Hospitalization Type       | Disease Category     | Location                         | Lag Selection | Age Group | Pollutants Model | Season of Analysis | Estimates (95% Confidence Interval) | Original Ozone Metric        | Reference                      |
|----------------------------|----------------------|----------------------------------|---------------|-----------|------------------|--------------------|-------------------------------------|------------------------------|--------------------------------|
|                            | Pneumonia            | 36 Cities <sup>d</sup><br>(U.S.) | Lag0          | 65+       | Single           | All                | -0.70 (-0.99, -0.41)                | 8-hr mean                    |                                |
|                            |                      |                                  |               |           |                  | Warm               | 0.03 (-0.35, 0.41)                  |                              |                                |
|                            |                      |                                  |               |           |                  | Cold               | -0.49 (-1.24, 0.26)                 |                              |                                |
|                            |                      |                                  | Lag1          | 65+       | Single           | All                | 0.64 (0.35, 0.94)                   |                              |                                |
|                            |                      |                                  |               |           |                  | Warm               | 1.29 (0.89, 1.69)                   |                              |                                |
|                            |                      |                                  |               |           |                  | Cold               | -0.52 (-1.03, -0.01)                |                              |                                |
|                            |                      |                                  | Lag0-1        | 65+       | Single           | All                | 0.92 (0.61, 1.23)                   |                              |                                |
|                            |                      |                                  |               |           |                  | Warm               | 1.26 (0.78, 1.74)                   |                              |                                |
|                            |                      |                                  |               |           |                  | Cold               | -2.52 (-3.42, -1.61)                |                              |                                |
|                            |                      |                                  |               |           | Multiple         | All                | 2.22 (0.82, 3.64)                   | 8-hr mean                    |                                |
| General Hospital Admission | Respiratory Diseases | 11 Areas<br>(NY, U.S.)           | Lag2          | 0-17      | Single           | All                | 1.34 (0.78, 1.90)                   | 1-hr max from<br>10am to 6pm | Lin et al., 2008 <sup>79</sup> |

<sup>a</sup> RD = Respiratory Diseases.

<sup>b</sup> The alternative ozone metric 1-hr maximum was also reported.

<sup>c</sup> The alternative ozone metric 4-hr maximum was also reported.

<sup>d</sup> 16 Cities in the U.S. for estimates from cold season analysis.

## References for Supplemental Material

1. Burnett RT, Cakmak S, Brook JR, Krewski D. The role of particulate size and chemistry in the association between summertime ambient air pollution and hospitalization for cardiorespiratory diseases. *Environ Health Perspect* 1997; 105:614-20.
2. Fusco D, Forastiere F, Michelozzi P, Spadea T, Ostro B, Arca M, Perucci CA. Air pollution and hospital admissions for respiratory conditions in Rome, Italy. *Eur Respir J* 2001; 17:1143-1150.
3. Luginaah IN, Fung KY, Gorey KM, Webster G, Wills C. Association of ambient air pollution with respiratory hospitalization in a government-designated "area of concern": the case of Windsor, Ontario. *Environ Health Perspect* 2005; 113:290-296.
4. Hagen JA, Nafstad P, Skrandal A, Bjorkly S, Magnus P. Associations between Outdoor Air Pollutants and Hospitalization for Respiratory Diseases. *Epidemiology* 2000; 11:136-140.
5. Middleton N, Yiallourous P, Kleanthous S, Kolokotroni O, Schwartz J, Dockery DW, Demokritou P, Koutrakis P. A 10-year time-series analysis of respiratory and cardiovascular morbidity in Nicosia, Cyprus: the effect of short-term changes in air pollution and dust storms. *Environ Health* 2008; 7:39.
6. Wong CM, Yang L, Thach TQ, Chau PY, Chan KP, Thomas GN, Lam TH, Wong TW, Hedley AJ, Peiris JS. Modification by influenza on health effects of air pollution in Hong Kong. *Environ Health Perspect* 2009; 117:248-53.
7. Schwartz J. Short term fluctuations in air pollution and hospital admissions of the elderly for respiratory disease. *Thorax* 1995; 50:531-538.
8. Schwartz J. Air pollution and hospital admissions for respiratory disease. *Epidemiology* 1996; 7:20-28.
9. Schwartz J, Spix C, Touloumi G, Bacharova L, Barumamdzadeh T, le Tertre A, Piekarksi T, Ponce de Leon A, Ponka A, Rossi G, Saez M, Schouten JP. Methodological issues in studies of air pollution and daily counts of deaths or hospital admissions. *J Epidemiol Community Health* 1996; 50 Suppl 1:S3-11.
10. Moolgavkar SH, Luebeck EG, Anderson EL. Air pollution and hospital admissions for respiratory causes in Minneapolis-St. Paul and Birmingham. *Epidemiology* 1997; 8:364-370.
11. Fung KY, Khan S, Krewski D, Chen Y. Association between Air Pollution and Multiple Respiratory Hospitalizations among the Elderly in Vancouver, Canada. *Inhalation Toxicology* 2006; 18:1005-1011.
12. Braga AL, Saldiva PH, Pereira LA, Menezes JJ, Conceicao GM, Lin CA, Zanobetti A, Schwartz J, Dockery DW. Health effects of air pollution exposure on children and adolescents in Sao Paulo, Brazil. *Pediatr Pulmonol* 2001; 31:106-113.
13. Schwartz J. Air pollution and hospital admissions for the elderly in Birmingham, Alabama. *Am J Epidemiol* 1994; 139:589-598.
14. Schwartz J. PM10, ozone, and hospital admissions for the elderly in Minneapolis-St. Paul, Minnesota. *Arch Environ Health* 1994; 49:366-374.
15. Schwartz J. Air pollution and hospital admissions for the elderly in Detroit, Michigan. *Am J Respir Crit Care Med* 1994; 150:648-655.
16. Dab W, Medina S, Quénel P, Le Moullec Y, Le Tertre A, Thelot B, Monteil C, Lameloise P, Pirard P, Momas I, Ferry R, Festy B. Short term respiratory health effects of

- ambient air pollution: results of the APHEA project in Paris. *J Epidemiol Community Health* 1996; 50:s42-s46.
17. Lee IM, Tsai SS, Chang CC, Ho CK, Yang CY. Air pollution and hospital admissions for chronic obstructive pulmonary disease in a tropical city: Kaohsiung, Taiwan. *Inhal Toxicol* 2007; 19:393-398.
  18. Yang CY, Chen CJ. Air pollution and hospital admissions for chronic obstructive pulmonary disease in a subtropical city: Taipei, Taiwan. *J Toxicol Environ Health A* 2007; 70:1214-1219.
  19. Morgan G, Corbett S, Wlodarczyk J. Air pollution and hospital admissions in Sydney, Australia, 1990 to 1994. *Am J Public Health* 1998; 88:1761-1766.
  20. Moolgavkar SH. Air pollution and hospital admissions for chronic obstructive pulmonary disease in three metropolitan areas in the United States. *Inhal Toxicol* 2000; 12 Suppl 4:75-90.
  21. Tsai SS, Cheng MH, Chiu HF, Wu TN, Yang CY. Air pollution and hospital admissions for asthma in a tropical city: Kaohsiung, Taiwan. *Inhal Toxicol* 2006; 18:549-554.
  22. Yang CY, Chen CC, Chen CY, Kuo HW. Air pollution and hospital admissions for asthma in a subtropical city: Taipei, Taiwan. *J Toxicol Environ Health A* 2007; 70:111-7.
  23. Erbas B, Chang JH, Dharmage S, Ong EK, Hyndman R, Newbiggin E, Abramson M. Do levels of airborne grass pollen influence asthma hospital admissions? *Clin Exp Allergy* 2007; 37:1641-7.
  24. Bell ML, Levy JK, Lin Z. The effect of sandstorms and air pollution on cause-specific hospital admissions in Taipei, Taiwan. *Occup Environ Med* 2008; 65:104-111.
  25. Lee J-T, Kim H, Song H, Hong Y-C, Cho Y-S, Shin S-Y, Hyun Y-J, Kim Y-S. Air pollution and asthma among children in Seoul, Korea. *Epidemiology* 2002; 13:481-484.
  26. Lin M, Chen Y, Burnett RT, Villeneuve PJ, Krewski D. Effect of short-term exposure to gaseous pollution on asthma hospitalisation in children: a bi-directional case-crossover analysis. *J Epidemiol Community Health* 2003; 57:50-55.
  27. Lin M, Chen Y, Villeneuve PJ, Burnett RT, Lemyre L, Hertzman C, McGrail KM, Krewski D. Gaseous air pollutants and asthma hospitalization of children with low household income in Vancouver, British Columbia, Canada. *Am J Epidemiol* 2004; 159:294-303.
  28. Lee SL, Wong WH, Lau YL. Association between air pollution and asthma admission among children in Hong Kong. *Clin Exp Allergy* 2006; 36:1138-46.
  29. Ponce de Leon A, Anderson HR, Bland JM, Strachan DP, Bower J. Effects of air pollution on daily hospital admissions for respiratory disease in London between 1987-88 and 1991-92. *J Epidemiol Community Health* 1996; 50:s63-70.
  30. Wong TW, Lau TS, Yu TS, Neller A, Wong SL, Tam W, Pang SW. Air pollution and hospital admissions for respiratory and cardiovascular diseases in Hong Kong. *Occup Environ Med* 1999; 56:679-683.
  31. Atkinson RW, Bremner SA, Anderson HR, Strachan DP, Bland JM, de Leon AP. Short-term associations between emergency hospital admissions for respiratory and cardiovascular disease and outdoor air pollution in London. *Arch Environ Health* 1999; 54:398-411.
  32. Gwynn RC, Burnett RT, Thurston GD. A time-series analysis of acidic particulate matter and daily mortality and morbidity in the Buffalo, New York region. *Environ Health Perspect* 2000; 108:125-133.

33. Gwynn RC, Thurston GD. The burden of air pollution: impacts among racial minorities. *Environ Health Perspect* 2001; 109 Suppl 4:501-6.
34. Anderson HR, Bremner SA, Atkinson RW, Harrison RM, Walters S. Particulate matter and daily mortality and hospital admissions in the west midlands conurbation of the United Kingdom: associations with fine and coarse particles, black smoke and sulphate. *Occup Environ Med* 2001; 58:504-510.
35. Petroschevsky A, Simpson RW, Thalib L, Rutherford S. Associations between outdoor air pollution and hospital admissions in Brisbane, Australia. *Arch Environ Health* 2001; 56:37-52.
36. Wong CM, Atkinson RW, Anderson HR, Hedley AJ, Ma S, Chau PY, Lam TH. A tale of two cities: effects of air pollution on hospital admissions in Hong Kong and London compared. *Environ Health Perspect* 2002; 110:67-77.
37. Oftedal B, Nafstad P, Magnus P, Bjorkly S, Skrondal A. Traffic related air pollution and acute hospital admission for respiratory diseases in Drammen, Norway 1995-2000. *Eur J Epidemiol* 2003; 18:671-675.
38. Schouten JP, Vonk JM, de Graaf A. Short term effects of air pollution on emergency hospital admissions for respiratory disease: results of the APHEA project in two major cities in The Netherlands, 1977-89. *J Epidemiol Community Health* 1996; 50:s22-29.
39. Prescott GJ, Cohen GR, Elton RA, Fowkes FG, Agius RM. Urban air pollution and cardiopulmonary ill health: a 14.5 year time series study. *Occup Environ Med* 1998; 55:697-704.
40. Anderson HR, Bremner SA, Atkinson RW, Harrison RM, Walters S. Particulate matter and daily mortality and hospital admissions in the west midlands conurbation of the United Kingdom: associations with fine and coarse particles, black smoke and sulphate. *Occup Environ Med* 2001; 58:504-10.
41. Yang Q, Chen Y, Shi Y, Burnett RT, McGrail KM, Krewski D. Association between ozone and respiratory admissions among children and the elderly in Vancouver, Canada. *Inhal Toxicol* 2003; 15:1297-1308.
42. Burnett RT, Smith-Doiron M, Stieb D, Cakmak S, Brook JR. Effects of particulate and gaseous air pollution on cardiorespiratory hospitalizations. *Arch Environ Health* 1999; 54:130-139.
43. Hinwood AL, De Klerk N, Rodriguez C, Jacoby P, Runnion T, Rye P, Landau L, Murray F, Feldwick M, Spickett J. The relationship between changes in daily air pollution and hospitalizations in Perth, Australia 1992-1998: a case-crossover study. *Int J Environ Health Res* 2006; 16:27-46.
44. Ko FW, Tam W, Wong TW, Chan DP, Tung AH, Lai CK, Hui DS. Temporal relationship between air pollutants and hospital admissions for chronic obstructive pulmonary disease in Hong Kong. *Thorax* 2007; 62:780-785.
45. Anderson HR, Ponce de Leon A, Bland JM, Bower JS, Emberlin J, Strachan DP. Air pollution, pollens, and daily admissions for asthma in London 1987-92. *Thorax* 1998; 53:842-848.
46. Tobías A, Sáez M, Galán I, Campbell MJ. Sensitivity analysis of common statistical models used to study the short-term effects of air pollution on health. *International Journal of Biometeorology* 2003; 47:227-229.

47. Ko FW, Tam W, Wong TW, Lai CK, Wong GW, Leung TF, Ng SS, Hui DS. Effects of air pollution on asthma hospitalization rates in different age groups in Hong Kong. *Clin Exp Allergy* 2007; 37:1312-1319.
48. Babin SM, Burkorn HS, Holtry RS, Tabernero NR, Stokes LD, Davies-Cole JO, DeHaan K, Lee DH. Pediatric patient asthma-related emergency department visits and admissions in Washington, DC, from 2001-2004, and associations with air quality, socio-economic status and age group. *Environ Health* 2007; 6:9.
49. Stieb DM, Beveridge RC, Brook JR, Smith-Doiron M, Burnett RT, Dales RE, Beaulieu S, Judek S, Mamedov A. Air pollution, aeroallergens and cardiorespiratory emergency department visits in Saint John, Canada. *J Expo Anal Environ Epidemiol* 2000; 10:461-477.
50. Peel JL, Tolbert PE, Klein M, Metzger KB, Flanders WD, Todd K, Mulholland JA, Ryan PB, Frumkin H. Ambient air pollution and respiratory emergency department visits. *Epidemiology* 2005; 16:164-74.
51. Wilson AM, Wake CP, Kelly T, Salloway JC. Air pollution, weather, and respiratory emergency room visits in two northern New England cities: an ecological time-series study. *Environ Res* 2005; 97:312-21.
52. Tolbert PE, Klein M, Peel JL, Sarnat SE, Sarnat JA. Multipollutant modeling issues in a study of ambient air quality and emergency department visits in Atlanta. *J Expo Sci Environ Epidemiol* 2007; 17 Suppl 2:s29-35.
53. Lin CA, Martins MA, Farhat SC, Pope CA, 3rd, Conceicao GM, Anastacio VM, Hatanaka M, Andrade WC, Hamaue WR, Bohm GM, Saldiva PH. Air pollution and respiratory illness of children in Sao Paulo, Brazil. *Paediatr Perinat Epidemiol* 1999; 13:475-488.
54. Ilabaca M, Olaeta I, Campos E, Villaire J, Tellez-Rojo MM, Romieu I. Association between levels of fine particulate and emergency visits for pneumonia and other respiratory illnesses among children in Santiago, Chile. *J Air Waste Manag Assoc* 1999; 49:154-163.
55. Galan I, Tobias A, Banegas JR, Aranguiz E. Short-term effects of air pollution on daily asthma emergency room admissions. *Eur Respir J* 2003; 22:802-808.
56. Boutin-Forzano S, Adel N, Gratecos L, Jullian H, Garnier JM, Ramadour M, Lanteaume A, Hamon M, Lafay V, Charpin D. Visits to the emergency room for asthma attacks and short-term variations in air pollution. A case-crossover study. *Respiration* 2004; 71:134-7.
57. Villeneuve PJ, Chen L, Rowe BH, Coates F. Outdoor air pollution and emergency department visits for asthma among children and adults: a case-crossover study in northern Alberta, Canada. *Environ Health* 2007; 6:40.
58. Kim SY, O'Neill MS, Lee JT, Cho Y, Kim J, Kim H. Air pollution, socioeconomic position, and emergency hospital visits for asthma in Seoul, Korea. *Int Arch Occup Environ Health* 2007; 80:701-710.
59. Paulu C, Smith AE. Tracking Associations Between Ambient Ozone and Asthma-Related Emergency Department Visits Using Case-Crossover Analysis. *Journal of Public Health Management and Practice* 2008; 14:581-591 10.1097/01.PHH.0000338371.53242.0e.
60. Romieu I, Meneses F, Sienra-Monge JJ, Huerta J, Ruiz Velasco S, White MC, Etzel RA, Hernandez-Avila M. Effects of urban air pollutants on emergency visits for childhood asthma in Mexico City. *Am J Epidemiol* 1995; 141:546-553.

61. Carlin BP, Xia H. Assessing Environmental Justice Using Bayesian Hierarchical Models: Two Case Studies. *Journal of Exposure Analysis and Environmental Epidemiology* 1999; 9:66-78.
62. Dales RE, Cakmak S, Burnett RT, Judek S, Coates F, Brook JR. Influence of Ambient Fungal Spores on Emergency Visits for Asthma to a Regional Children's Hospital. *Am. J. Respir. Crit. Care Med.* 2000; 162:2087-2090.
63. Fauroux B, Sampil M, Quenel P, Lemoullec Y. Ozone: a trigger for hospital pediatric asthma emergency room visits. *Pediatr Pulmonol* 2000; 30:41-46.
64. Tolbert PE, Mulholland JA, MacIntosh DL, Xu F, Daniels D, Devine OJ, Carlin BP, Klein M, Dorley J, Butler AJ, Nordenberg DF, Frumkin H, Ryan PB, White MC. Air quality and pediatric emergency room visits for asthma in Atlanta, Georgia, USA. *Am J Epidemiol* 2000; 151:798-810.
65. Thompson AJ, Shields MD, Patterson CC. Acute asthma exacerbations and air pollutants in children living in Belfast, Northern Ireland. *Arch Environ Health* 2001; 56:234-41.
66. Erbas B, Kelly AM, Physick B, Code C, Edwards M. Air pollution and childhood asthma emergency hospital admissions: estimating intra-city regional variations. *Int J Environ Health Res* 2005; 15:11-20.
67. Mohr LB, Luo S, Mathias E, Tobing R, Homan S, Sterling D. Influence of season and temperature on the relationship of elemental carbon air pollution to pediatric asthma emergency room visits. *J Asthma* 2008; 45:936-943.
68. Szyszkowicz M. Ambient air pollution and daily emergency department visits for asthma in Edmonton, Canada. *Int J Occup Med Environ Health* 2008; 21:25-30.
69. Jayaraman G, Nidhi. Air pollution and associated respiratory morbidity in Delhi. *Health Care Manag Sci* 2008; 11:132-8.
70. Burnett RT, Brook JR, Yung WT, Dales RE, Krewski D. Association between ozone and hospitalization for respiratory diseases in 16 Canadian cities. *Environ Res* 1997; 72:24-31.
71. Sunyer J, Spix C, Quenel P, Ponce-de-Leon A, Ponka A, Barumandzadeh T, Touloumi G, Bacharova L, Wojtyniak B, Vonk J, Bisanti L, Schwartz J, Katsouyanni K. Urban air pollution and emergency admissions for asthma in four European cities: the APHEA Project. *Thorax* 1997; 52:760-765.
72. Anderson HR, Spix C, Medina S, Schouten JP, Castellsague J, Rossi G, Zmirou D, Touloumi G, Wojtyniak B, Ponka A, Bacharova L, Schwartz J, Katsouyanni K. Air pollution and daily admissions for chronic obstructive pulmonary disease in 6 European cities: results from the APHEA project. *Eur Respir J* 1997; 10:1064-1071.
73. Spix C, Anderson HR, Schwartz J, Vigotti MA, LeTertre A, Vonk JM, Touloumi G, Balducci F, Piekarski T, Bacharova L, Tobias A, Ponka A, Katsouyanni K. Short-term effects of air pollution on hospital admissions of respiratory diseases in Europe: a quantitative summary of APHEA study results. *Air Pollution and Health: a European Approach. Arch Environ Health* 1998; 53:54-64.
74. Jaffe DH, Singer ME, Rimm AA. Air pollution and emergency department visits for asthma among Ohio Medicaid recipients, 1991-1996. *Environ Res* 2003; 91:21-28.
75. Simpson R, Williams G, Petroschevsky A, Best T, Morgan G, Denison L, Hinwood A, Neville G. The short-term effects of air pollution on hospital admissions in four Australian cities. *Aust N Z J Public Health* 2005; 29:213-221.
76. Cakmak S, Dales RE, Judek S. Respiratory health effects of air pollution gases: modification by education and income. *Arch Environ Occup Health* 2006; 61:5-10.



77. Dales RE, Cakmak S, Doiron MS. Gaseous air pollutants and hospitalization for respiratory disease in the neonatal period. *Environ Health Perspect* 2006; 114:1751-1754.
78. Medina-Ramon M, Zanobetti A, Schwartz J. The effect of ozone and PM10 on hospital admissions for pneumonia and chronic obstructive pulmonary disease: a national multicity study. *Am J Epidemiol* 2006; 163:579-588.
79. Lin S, Bell EM, Liu W, Walker RJ, Kim NK, Hwang SA. Ambient ozone concentration and hospital admissions due to childhood respiratory diseases in New York State, 1991-2001. *Environ Res* 2008; 108:42-47.
